# Supplementary material for: 3D collagen architecture induces a conserved migratory and transcriptional response linked to vasculogenic mimicry
Source: PubMed Central journal article supplement (PMC5698427; doi:10.1038/s41467-017-01556-7), 2017-11-21
Supplement: 41467_2017_1556_MOESM1_ESM.pdf [file 41467_2017_1556_MOESM1_ESM.pdf]

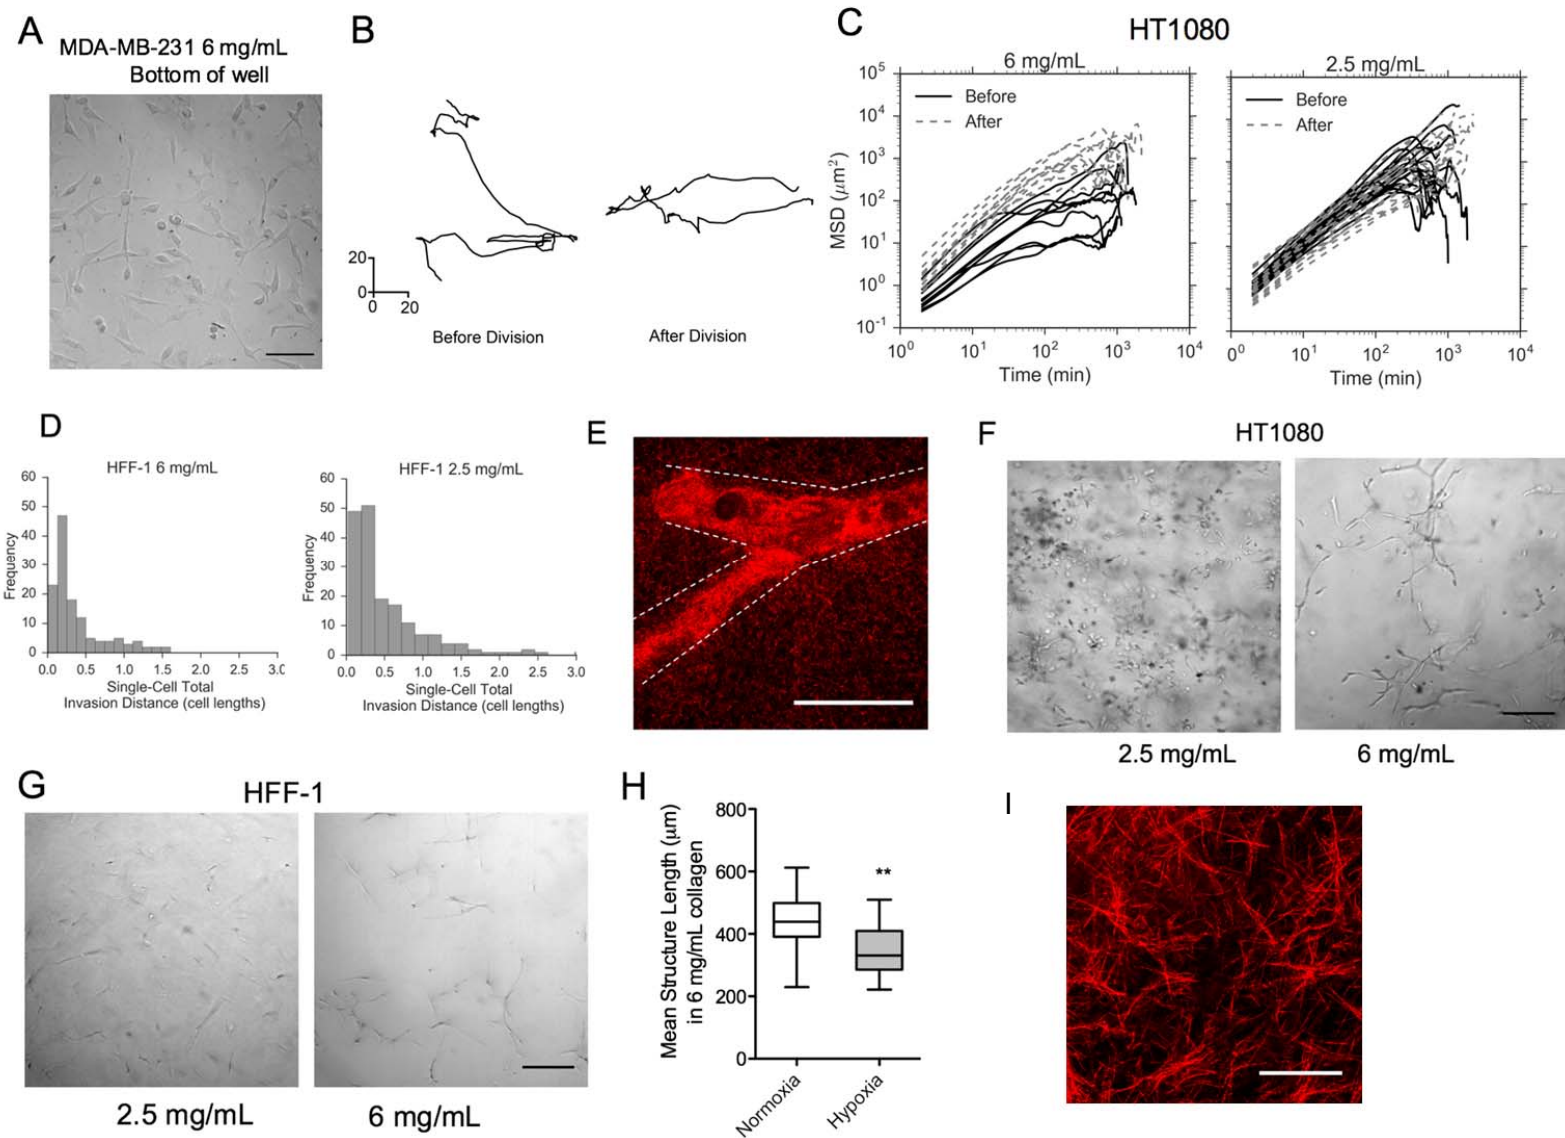

**Supplementary Figure 1.** **A.** Representative bright field image of MDA-MB-231 cells embedded in a 6mg/mL collagen gel but in contact with the coverslip. Scale bar 100  $\mu\text{m}$  **B.** Representative trajectories of cells embedded in a 6mg/mL collagen gel but in close contact with the coverslip before and after cell division. The trajectories show no appreciable differences between the cell movement before or after division. **C.** Mean Squared Displacement (MSD) and persistent time of HT-1080 cells before and after cell division for cells in low density and high density collagen. MSDs shown are 12 representative cell trajectories. **D.** Total invasion distance of single cells and their progeny for HFF-1 fibroblasts cells in 6 mg/mL (left) and 2.5mg/mL (right) collagen gels in units of cell length (see methods) after 48 h of cell encapsulation. **E.** Representative confocal reflection image showing collagen fibers around a chain structure formed by MDA-MB-231 cells cultured in high density collagen gel for 7 days, dotted lines show the outline of the chain structure. Scale bar 100 $\mu\text{m}$ . **F.** Representative bright field images of HT-1080 cells after 7 days of culture in 2.5 mg/mL (left) and 6 mg/mL (right) collagen I matrix. Scale bar 250  $\mu\text{m}$ . **G.** Representative bright field images of HFF-1 fibroblast cells after 7 days of culture in 2.5 mg/mL (left) and 6 mg/mL (right) collagen I matrix. Scale bar 250  $\mu\text{m}$ . **H.** Mean structure length formed by MDA-MB-231 cells cultured in high density 3D collagen after 7 days under normoxia (21%  $\text{O}_2$ ) or hypoxia (1%  $\text{O}_2$ ). Comparison was performed using Mann–Whitney U test. **I.** Representative confocal reflection image showing a 2.5mg/mL collagen gel polymerized at 20°C Scale bar 100  $\mu\text{m}$ . Representative images of N=3 biological replicates for all experiments unless otherwise noted. Statistical significance is indicated as \*, \*\*, \*\*\* for  $p \leq 0.05$ ,  $p \leq 0.01$ ,  $p \leq 0.001$  respectively.

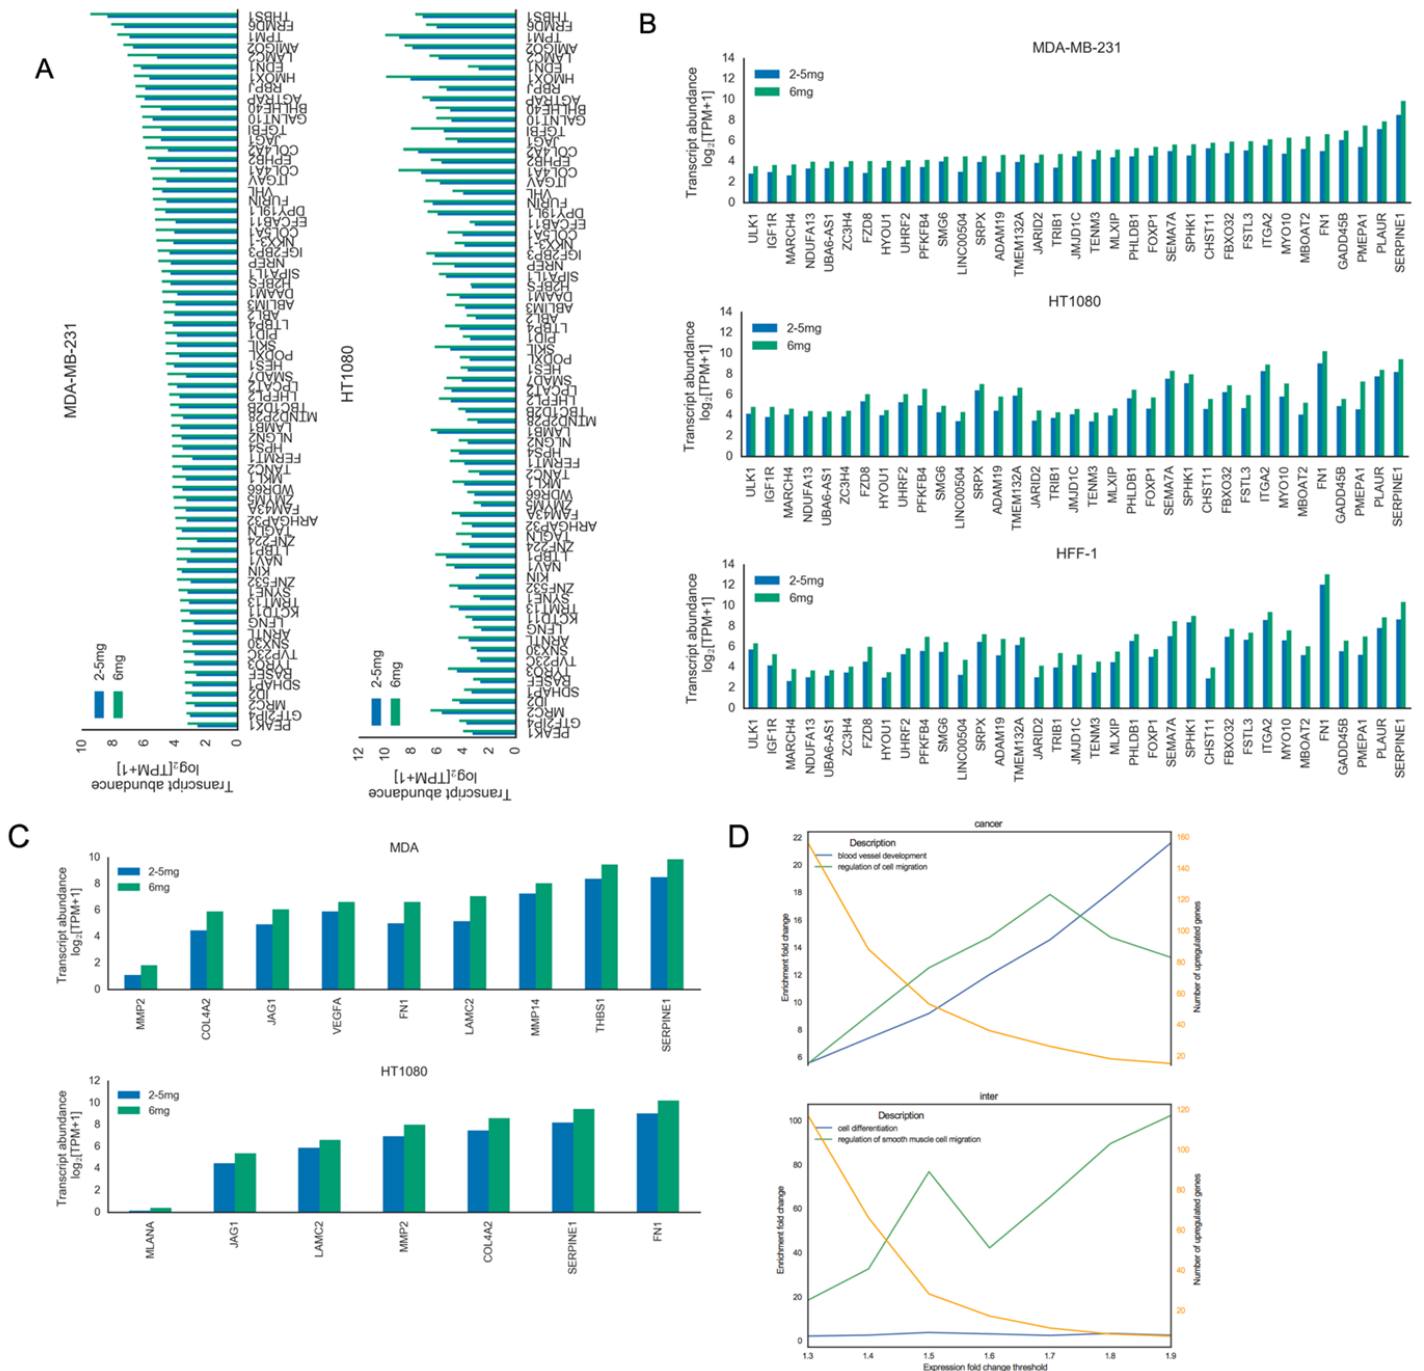

**Supplementary Figure 2. A.** Bar plot showing mean of  $n=3$  expression values of the 70 genes upregulated by both cancer cell lines. MDA-MB-231 (top), genes sorted by low to high level of expression. HT1080 (bottom) gene order from top panel. **B.** Bar plot showing mean of  $n=3$  expression values of the 35 genes upregulated by cancer cells and HFF-1 fibroblasts. MDA-MB-231 (top), genes sorted by low to high level of expression. HT1080 (middle) and HFF-1 (bottom) gene order from top panel. **C.** Mean of  $n=3$  expression levels of genes previously reported as being involved in vasculogenic mimicry and upregulated by cancer cells in high density collagen. For this panel  $\text{TPM}>5$  was not required for analysis. **D.** Sensitivity analysis of Gene Ontology Analysis presented in Figure 2. Left Panel: Plot showing number of genes included in the analysis as a function of fold change threshold (yellow) and fold enrichment of 2 key terms (blood vessel development and regulation of cell migration, blue and green respectively) for the two gene sets cancer specific (70 Genes) and common to all cell lines analyzed (35 genes). Right panel shows the full sensitivity analysis when the

fold change threshold is varied from 1.3 to 1.9. Details of the analysis can be found in the Methods section.

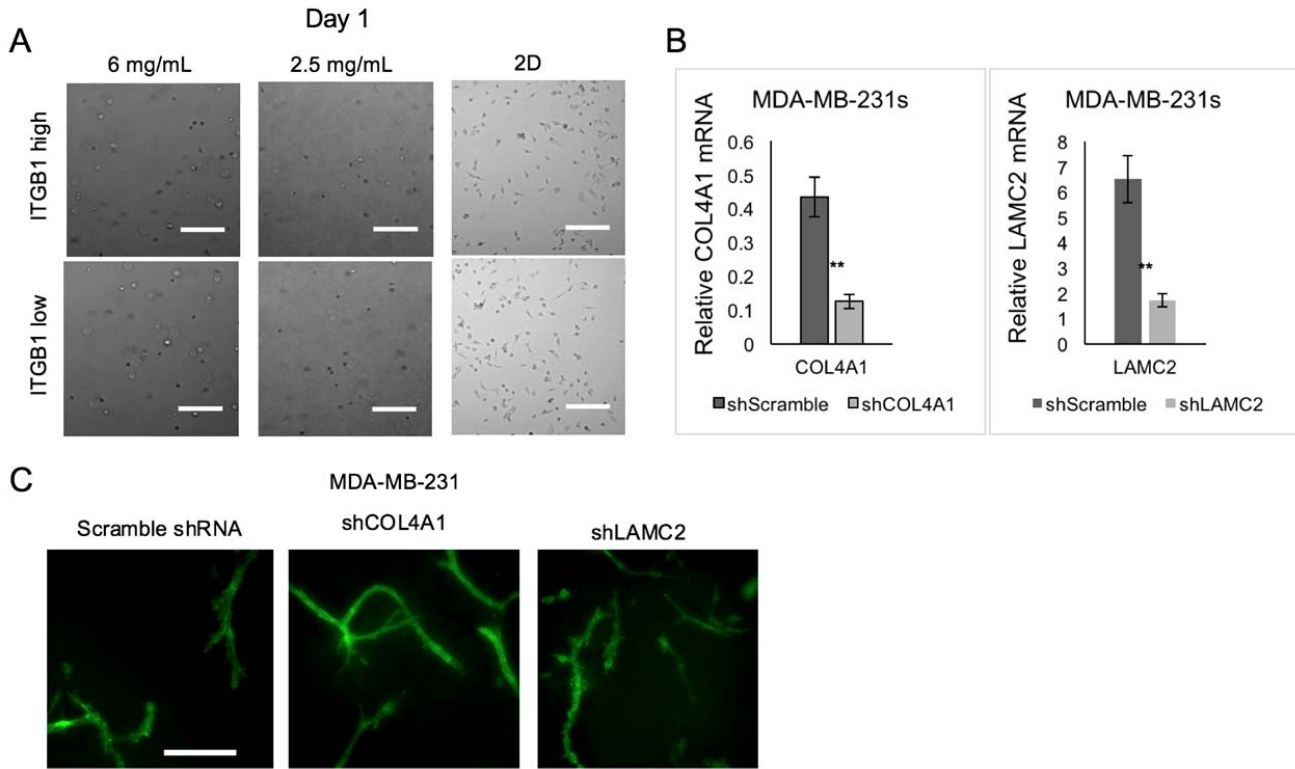

**Supplementary Figure 3. A.** ITGB1 sorted MDA-MB-231 cells at day 1 of embedding in high density and low density collagen matrices and plated on tissue culture plastic (2D). Scale bar 200  $\mu$ m. **B.** RT-qPCR validation of shRNA mediated knock down of LAMC2 and COL4A1 **C.** Representative images of MDA-MB-231 cells expressing shRNA constructs against a scramble sequence, COL4A1, or LAMC2 after 7 days of culture in high density collagen Scale bar 200 $\mu$ m. **N=3 biological replicates for all experiments unless otherwise noted. Statistical significance was determined by Wilcoxon rank sum test and is indicated as \*, \*\*, \*\*\* for  $p \leq 0.05$ ,  $p \leq 0.01$ ,  $p \leq 0.001$  respectively.**

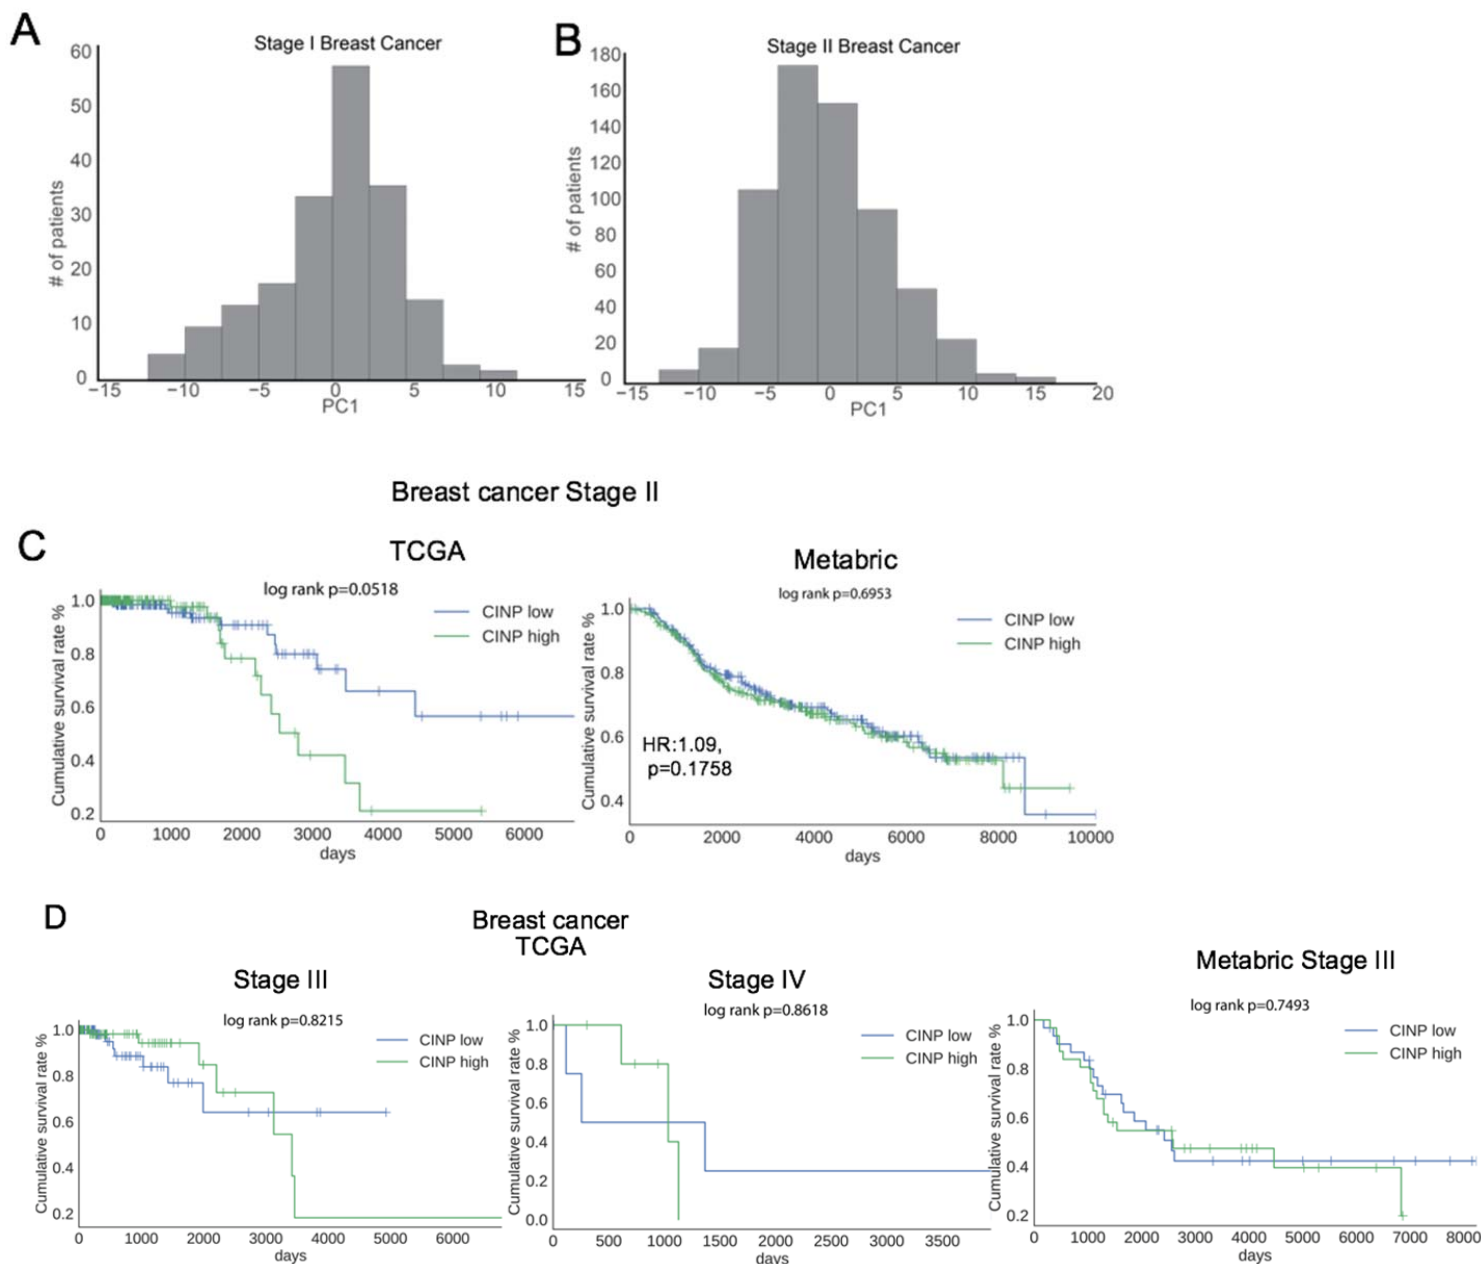

**Supplementary Figure 4.** **A.** Loadings of the first principal component (PC1) in stage I breast cancer patients of the 70 CINP associated genes identified in this study (Figure 2). **B.** Loadings of the first principal component (PC1) in stage II breast cancer patients of the 70 CINP associated genes identified in this study (Figure 2). **C.** Kaplan Meier survival analysis of stage II breast cancer patients in TCGA (left) and Metabric (right) databases when the PC1 loadings were used as an expression metagene. **D.** Kaplan Meier plots showing survival prediction by the CINP gene signature in Stage III and Stage IV breast cancer from TCGA data and stage III from metabric.

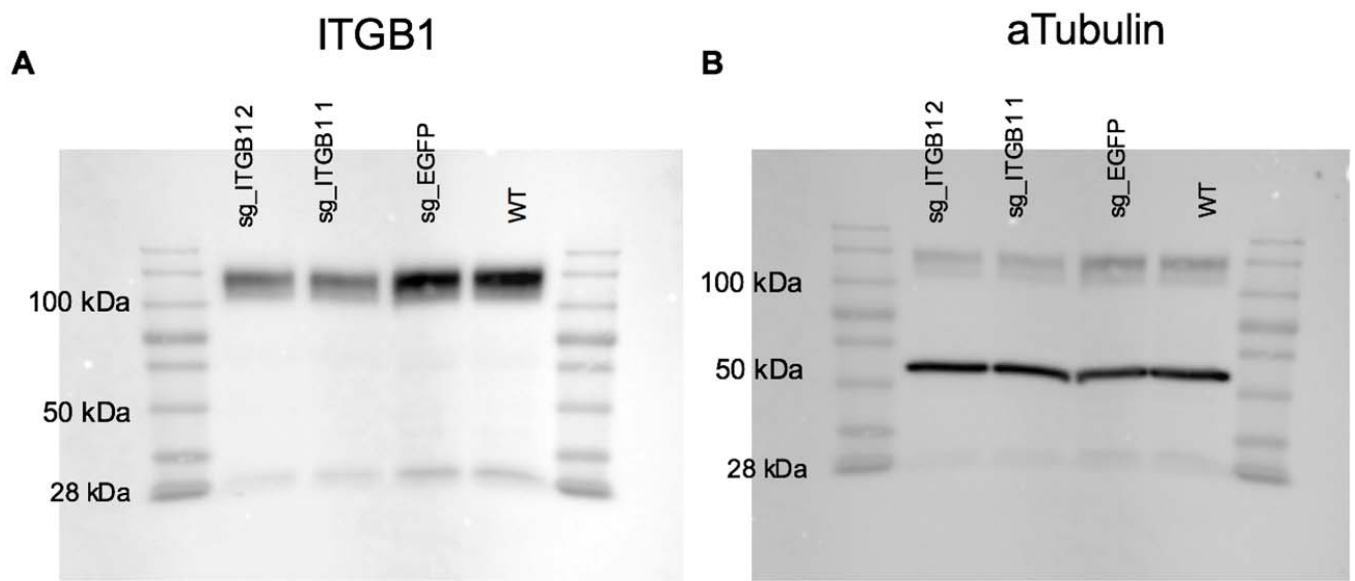

**Supplementary Figure 5. Uncropped Western blots from Figure 4A. A. Integrin B1 Western blot. B. Alpha tubulin western blot.**

**Supplementary Table 1. Sensitivity analysis of GO enrichment**

| fcThreshold | geneList | Description                                | # genes in set | expectation | fold_enrich |
|-------------|----------|--------------------------------------------|----------------|-------------|-------------|
| 1.3         | 70 Genes | blood vessel development                   | 16             | 2.890       | 5.536       |
|             |          | regulation of cell migration               | 13             | 2.356       | 5.518       |
|             | 35 Genes | cell differentiation                       | 28             | 13.647      | 2.052       |
|             |          | regulation of smooth muscle cell migration | 3              | 0.164       | 18.333      |
| 1.4         | 70 Genes | blood vessel development                   | 12             | 1.630       | 7.361       |
|             |          | regulation of cell migration               | 12             | 1.329       | 9.030       |
|             | 35 Genes | cell differentiation                       | 19             | 7.696       | 2.469       |
|             |          | regulation of smooth muscle cell migration | 3              | 0.092       | 32.511      |
| 1.5         | 70 Genes | blood vessel development                   | 9              | 0.982       | 9.167       |
|             |          | regulation of cell migration               | 10             | 0.800       | 12.496      |
|             | 35 Genes | cell differentiation                       | 12             | 3.265       | 3.676       |
|             |          | regulation of smooth muscle cell migration | 3              | 0.039       | 76.639      |
| 1.6         | 70 Genes | blood vessel development                   | 8              | 0.667       | 11.997      |
|             |          | regulation of cell migration               | 8              | 0.544       | 14.718      |
|             | 35 Genes | cell differentiation                       | 6              | 1.982       | 3.027       |
|             |          | regulation of smooth muscle cell migration | 1              | 0.024       | 42.076      |
| 1.7         | 70 Genes | blood vessel development                   | 7              | 0.482       | 14.534      |
|             |          | regulation of cell migration               | 7              | 0.393       | 17.832      |
|             | 35 Genes | cell differentiation                       | 3              | 1.283       | 2.339       |
|             |          | regulation of smooth muscle cell migration | 1              | 0.015       | 65.027      |
| 1.8         | 70 Genes | blood vessel development                   | 6              | 0.333       | 17.995      |
|             |          | regulation of cell migration               | 4              | 0.272       | 14.718      |
|             | 35 Genes | cell differentiation                       | 3              | 0.933       | 3.216       |
|             |          | regulation of smooth muscle cell migration | 1              | 0.011       | 89.413      |
| 1.9         | 70 Genes | blood vessel development                   | 6              | 0.278       | 21.594      |
|             |          | regulation of cell migration               | 3              | 0.226       | 13.246      |
|             | 35 Genes | cell differentiation                       | 2              | 0.816       | 2.450       |
|             |          | regulation of smooth muscle cell migration | 1              | 0.010       | 102.186     |

**Supplementary Table 2. Gene ontology enrichment analysis for the genes in the 70 gene list**

| GO Term                                                                  | #genes in set | genes in set                                                                                                                                                              |
|--------------------------------------------------------------------------|---------------|---------------------------------------------------------------------------------------------------------------------------------------------------------------------------|
| regulation of cell migration                                             | 10            | EDN1 JAG1 PODXL TPM1 HMOX1 FURIN LAMB1 RBPJ THBS1 SMAD7                                                                                                                   |
| regulation of developmental process                                      | 16            | EDN1 JAG1 LTBP4 HPS4 THBS1 SMAD7 SIPA1L1 COL4A2 ID2 HMOX1 ITGAV HES1 VHL EPHB2 SKIL NKX3-1                                                                                |
| regulation of cellular component movement                                | 10            | EDN1 JAG1 PODXL TPM1 HMOX1 FURIN LAMB1 RBPJ THBS1 SMAD7                                                                                                                   |
| regulation of locomotion                                                 | 10            | EDN1 JAG1 PODXL TPM1 HMOX1 FURIN LAMB1 RBPJ THBS1 SMAD7                                                                                                                   |
| anatomical structure development                                         | 27            | TAGLN NLGN2 LAMC2 RBPJ THBS1 SYNE1 LFNG SIPA1L1 PODXL HMOX1 ITGAV HES1 IGF2BP3 VHL EPHB2 SKIL NKX3-1 EDN1 JAG1 TPM1 NAV1 LAMB1 SMAD7 COL5A1 COL4A1 ID2 KCTD11             |
| regulation of multicellular organismal process                           | 17            | EDN1 NLGN2 JAG1 TPM1 FURIN THBS1 SMAD7 SIPA1L1 COL4A2 ID2 BHLHE40 HMOX1 HES1 IGF2BP3 EPHB2 SKIL NKX3-1                                                                    |
| system development                                                       | 25            | TAGLN NLGN2 LAMC2 RBPJ THBS1 LFNG SIPA1L1 PODXL HMOX1 ITGAV HES1 VHL EPHB2 SKIL NKX3-1 EDN1 JAG1 TPM1 NAV1 LAMB1 SMAD7 COL5A1 COL4A1 ID2 KCTD11                           |
| developmental process                                                    | 29            | TAGLN NLGN2 LTBP4 LAMC2 FURIN RBPJ THBS1 SYNE1 LFNG SIPA1L1 PODXL HMOX1 ITGAV HES1 IGF2BP3 VHL EPHB2 SKIL NKX3-1 EDN1 JAG1 TPM1 NAV1 LAMB1 SMAD7 COL5A1 COL4A1 ID2 KCTD11 |
| blood vessel development                                                 | 9             | EDN1 JAG1 COL5A1 COL4A1 HMOX1 ITGAV VHL THBS1 SMAD7                                                                                                                       |
| vasculature development                                                  | 9             | EDN1 JAG1 COL5A1 COL4A1 HMOX1 ITGAV VHL THBS1 SMAD7                                                                                                                       |
| cellular component organization                                          | 25            | NLGN2 LAMC2 RBPJ THBS1 SYNE1 MRC2 SIPA1L1 ABLIM3 HMOX1 ITGAV HES1 VHL EPHB2 SKIL TPM1 HPS4 NAV1 LAMB1 H2BFS SMAD7 DAAM1 COL4A2 COL5A1 LPCAT2 TGFB1                        |
| anatomical structure formation involved in morphogenesis                 | 10            | EDN1 JAG1 COL4A1 PODXL TPM1 HMOX1 VHL THBS1 SKIL NKX3-1                                                                                                                   |
| anatomical structure morphogenesis                                       | 17            | EDN1 JAG1 TPM1 LAMB1 THBS1 SMAD7 LFNG COL5A1 COL4A1 PODXL HMOX1 HES1 IGF2BP3 VHL EPHB2 SKIL NKX3-1                                                                        |
| regulation of transforming growth factor beta receptor signaling pathway | 5             | LTBP4 FURIN THBS1 SKIL SMAD7                                                                                                                                              |
| organ development                                                        | 20            | EDN1 TAGLN JAG1 TPM1 LAMC2 LAMB1 THBS1 SMAD7 LFNG COL5A1 COL4A1 PODXL ID2 HMOX1 ITGAV HES1 VHL EPHB2 SKIL NKX3-1                                                          |
| multicellular organismal development                                     | 26            | TAGLN NLGN2 LTBP4 LAMC2 RBPJ THBS1 LFNG SIPA1L1 PODXL HMOX1 ITGAV HES1 VHL EPHB2 SKIL NKX3-1 EDN1 JAG1 TPM1 NAV1 LAMB1 SMAD7 COL5A1 COL4A1 ID2 KCTD11                     |
| negative regulation of cellular process                                  | 20            | EDN1 JAG1 TPM1 AMIGO2 FURIN RBPJ THBS1 SMAD7 PODXL ID2 BHLHE40 HMOX1 ITGAV HES1 IGF2BP3 VHL TGFB1 EPHB2 SKIL NKX3-1                                                       |
| negative regulation of biological process                                | 21            | EDN1 JAG1 TPM1 AMIGO2 FURIN RBPJ THBS1 SMAD7 COL4A2 PODXL ID2 BHLHE40 HMOX1 ITGAV HES1 IGF2BP3 VHL TGFB1 EPHB2 SKIL NKX3-1                                                |
| regulation of cell differentiation                                       | 11            | EDN1 SIPA1L1 JAG1 ID2 LTBP4 ITGAV HES1 VHL EPHB2 SKIL SMAD7                                                                                                               |

**Supplementary Table 3. Gene ontology enrichment analysis for the genes in the 35 gene list**

| GO Term                                                | #genes in set | genes in set                                                             |
|--------------------------------------------------------|---------------|--------------------------------------------------------------------------|
| regulation of smooth muscle cell migration             | 3             | ITGA2 SERPINE1 TRIB1                                                     |
| cell differentiation                                   | 12            | SEMA7A UHRF2 CHST11 GADD45B ITGA2 SPHK1 FN1 FZD8 ULK1 JARID2 FSTL3 IGF1R |
| cellular developmental process                         | 12            | SEMA7A UHRF2 CHST11 GADD45B ITGA2 SPHK1 FN1 FZD8 ULK1 JARID2 FSTL3 IGF1R |
| regulation of cell migration                           | 5             | ITGA2 SPHK1 SERPINE1 TRIB1 IGF1R                                         |
| developmental growth                                   | 4             | CHST11 SERPINE1 PLAUR ULK1                                               |
| negative regulation of smooth muscle cell migration    | 2             | SERPINE1 TRIB1                                                           |
| regulation of cellular component movement              | 5             | ITGA2 SPHK1 SERPINE1 TRIB1 IGF1R                                         |
| regulation of locomotion                               | 5             | ITGA2 SPHK1 SERPINE1 TRIB1 IGF1R                                         |
| positive regulation of cell migration                  | 4             | ITGA2 SPHK1 SERPINE1 IGF1R                                               |
| positive regulation of cellular component movement     | 4             | ITGA2 SPHK1 SERPINE1 IGF1R                                               |
| positive regulation of locomotion                      | 4             | ITGA2 SPHK1 SERPINE1 IGF1R                                               |
| regulation of protein metabolic process                | 7             | NDUFA13 ITGA2 SPHK1 SERPINE1 PLAUR JARID2 TRIB1                          |
| regulation of cellular component organization          | 6             | ITGA2 SPHK1 SERPINE1 FN1 ULK1 JARID2                                     |
| positive regulation of smooth muscle contraction       | 2             | ITGA2 SPHK1                                                              |
| growth                                                 | 4             | CHST11 SERPINE1 PLAUR ULK1                                               |
| positive regulation of cellular component organization | 4             | ITGA2 SPHK1 SERPINE1 JARID2                                              |
| positive regulation of muscle contraction              | 2             | ITGA2 SPHK1                                                              |
| regulation of cell proliferation                       | 7             | CHST11 ITGA2 SPHK1 SERPINE1 JARID2 TRIB1 IGF1R                           |



**Supplementary table 4. TCGA analysis not significant effect cox p >0.05**

| <b>Cancer type</b> | <b>Patient count</b> | <b>Death Observed</b> | <b>HR</b> | <b>Cox p</b> |
|--------------------|----------------------|-----------------------|-----------|--------------|
| <b>BRCA</b>        | 1131                 | 104                   | 1.1116    | 0.3268       |
| <b>UCEC</b>        | 555                  | 45                    | 1.2440    | 0.1955       |
| <b>HNSC</b>        | 518                  | 167                   | 1.1604    | 0.0748       |
| <b>PRAD</b>        | 505                  | 8                     | 1.3992    | 0.4090       |
| <b>THCA</b>        | 504                  | 14                    | 1.0754    | 0.8104       |
| <b>COAD</b>        | 499                  | 59                    | 0.8250    | 0.1646       |
| <b>LUSC</b>        | 489                  | 154                   | 1.0746    | 0.3913       |
| <b>LIHC</b>        | 369                  | 89                    | 1.1355    | 0.2679       |
| <b>OV</b>          | 337                  | 185                   | 1.0028    | 0.9721       |
| <b>KIRP</b>        | 287                  | 32                    | 1.2456    | 0.2371       |
| <b>STAD</b>        | 279                  | 77                    | 1.2858    | 0.0571       |
| <b>SARC</b>        | 257                  | 75                    | 0.9090    | 0.4110       |
| <b>PCPG</b>        | 179                  | 6                     | 0.8633    | 0.7016       |
| <b>READ</b>        | 165                  | 9                     | 0.5978    | 0.3112       |
| <b>GBM</b>         | 156                  | 53                    | 1.1312    | 0.2311       |
| <b>TGCT</b>        | 133                  | 3                     | 0.9231    | 0.9001       |
| <b>THYM</b>        | 120                  | 6                     | 1.0127    | 0.9496       |
| <b>ESCA</b>        | 119                  | 57                    | 0.7878    | 0.6258       |
| <b>SKCM</b>        | 93                   | 10                    | 1.6624    | 0.2016       |
| <b>UVM</b>         | 80                   | 13                    | 1.4671    | 0.1305       |
| <b>UCS</b>         | 57                   | 25                    | 0.8913    | 0.5450       |
| <b>DLBC</b>        | 47                   | 5                     | 0.9887    | 0.9806       |
| <b>CHOL</b>        | 36                   | 16                    | 1.0232    | 0.9343       |

**Supplementary Table 4.** Cancer types for which there is data available in TCGA but no significant differences between high and low **CINP** groups were detected. Table shows number of patients available, number of deaths reported, hazard ratio and cox model p value. See methods for analysis details.
